# Supplementary material
Source: PubMed Central journal article supplement (PMC4405477)
Supplement: NIHMS676007-supplement-Supp_TableS1-S3.pdf [file NIHMS676007-supplement-Supp_TableS1-S3.pdf]

Table S1 – *Monodelphis* species and laboratory strains surveyed in this study. The sample size (N) associated with each species/strain is reported on the second column. Strain names correspond to the strain identifications at the Texas Biomedical Research Institute.

| Strain Name | N  |
|-------------|----|
| ATHH2/AH11L | 15 |
| ATHL/ATHLH  | 2* |
| FD2M        | 14 |
| FD2M1       | 13 |
| FD2M2       | 11 |
| FD2M4       | 12 |
| FD3         | 13 |
| FD4         | 13 |
| FD5         | 12 |
| FD6         | 10 |
| FD7         | 15 |
| FD8X        | 7  |
| LL1         | 19 |
| LL2         | 15 |
| LSD         | 15 |
| PBP         | 13 |

| Species Name                    | N   |
|---------------------------------|-----|
| <i>Monodelphis domestica</i>    | 92  |
| <i>Monodelphis glirina</i>      | 77  |
| <i>Monodelphis palliolata</i>   | 46  |
| <i>Monodelphis brevicaudata</i> | 28  |
| <i>Monodelphis arlindoi</i>     | 14  |
| <i>Monodelphis touan</i>        | 12  |
| <b>Total</b>                    | 468 |

\* Removal of ATHL/ATHLH results in a virtually identical G-matrix estimate

Table S2 – Linear measurements used to represent overall cranial morphology. The association between each measurement and the developmental/functional regions of the mammalian cranium is illustrated in the second column. Landmark abbreviations correspond to the ones in Figure 1.

| <b>Measurement</b> | <b>Region</b> | <b>Measurement</b> | <b>Region</b>      |
|--------------------|---------------|--------------------|--------------------|
| <b>IS-PM</b>       | Face          | <b>PT-EAM</b>      | Neurocranium       |
| <b>IS-NSL</b>      | Face          | <b>PT-ZYGO</b>     | Face               |
| <b>IS-PNS</b>      | Face          | <b>PT-TSP</b>      | Neurocranium, Face |
| <b>PM-ZS</b>       | Face          | <b>ZS-ZI</b>       | Face               |
| <b>PM-ZI</b>       | Face          | <b>ZI-MT</b>       | Face               |
| <b>PM-MT</b>       | Face          | <b>ZI-ZYGO</b>     | Face               |
| <b>NSL-NA</b>      | Face          | <b>ZI-TSP</b>      | Face               |
| <b>NSL-ZS</b>      | Face          | <b>MT-PNS</b>      | Face               |
| <b>NSL-ZI</b>      | Face          | <b>PNS-APET</b>    | Neurocranium       |
| <b>NA-BR</b>       | Neurocranium  | <b>APET-BA</b>     | Neurocranium       |
| <b>NA-PNS</b>      | Face          | <b>APET-TS</b>     | Neurocranium       |
| <b>BR-PT</b>       | Neurocranium  | <b>BA-EAM</b>      | Neurocranium       |
| <b>BR-APET</b>     | Neurocranium  | <b>EAM-ZYGO</b>    | Face               |
| <b>PT-APET</b>     | Neurocranium  | <b>ZYGO-TSP</b>    | Face               |
| <b>PT-BA</b>       | Neurocranium  | <b>BA-OPI</b>      | Neurocranium       |

Table S3- Summary of factors that were controlled for in each species. We tested the effect of these factors on trait means using multivariate analyses of variance (MANOVA). Whenever significant ( $p < 0.05$ ), the effects of these factors were controlled for. SX=sex; A=age; \* =interaction between two factors; df=degrees of freedom.

| <b>Dataset</b>                   | <b>Controlled variable</b> | <b>Wilk's <math>\lambda</math>/df<br/>(Sex)</b> | <b>Wilk's <math>\lambda</math>/df<br/>(Age)</b> | <b>Wilk's <math>\lambda</math>/df<br/>(Sex * Age)</b> |
|----------------------------------|----------------------------|-------------------------------------------------|-------------------------------------------------|-------------------------------------------------------|
| <b>Monodelphis domestica</b>     | SX,A                       | 0.356/30,59                                     | 0.294/60,118                                    |                                                       |
| <b>Monodelphis glirina</b>       | SX,A, SX*A                 | 0.281/30,42                                     | 0.19/60,84                                      | 0.25/60,84                                            |
| <b>Monodelphis palliolata</b>    | SX,SX*A                    | 0.057/30,13                                     |                                                 | 0.022/60,26                                           |
| <b>Monodelphis breviceaudata</b> |                            |                                                 |                                                 |                                                       |
